# Supplementary material for: Breathing–swallowing discoordination is associated with frequent exacerbations of COPD
Source: PubMed Central journal article supplement — BMJ Open Respir Res. 2017 Jun 4;4(1):e000202. doi: 10.1136/bmjresp-2017-000202 (PMC5531308; doi:10.1136/bmjresp-2017-000202), 2017-06-04
Supplement: bmjresp-2017-000202supp001.pdf [file bmjresp-2017-000202supp001.pdf]

**e-Table 1.** Inclusion and exclusion criteria

---

Inclusion criteria

- 1) Age 40 years old or greater
- 2) Smoking 20 pack-years or greater
- 3) Those who were diagnosed with COPD by the GOLD criteria (<http://goldcopd.org/>)
- 4) Those who had enrolled in our prospective observational cohort study for at least one year
- 4) Those who were in a stable state judging from the personal diary

Exclusion criteria

- 1) Patients with an apparent swallowing disorder
  - 2) Patients with bronchial asthma
  - 3) Patients who suffered from malignant tumour diseases within 5 years or who have a malignant tumour
  - 4) Patients who have or had clinically evident cerebrovascular diseases
  - 5) Patients who were implanted with a cardiac pacemaker
  - 6) Patients with dementia
  - 7) Patients who could not perform lung function tests
  - 8) Patients who were judged inappropriate by medical doctors
-
